# Supplementary material for: Preclinical evaluation of PSMA expression in response to androgen receptor blockade for theranostics in prostate cancer
Source: Springer Nature journal article supplement (doi:10.1186/s13550-018-0451-z), 2018-10-29
Supplement: MOESM1 [file 16234840]

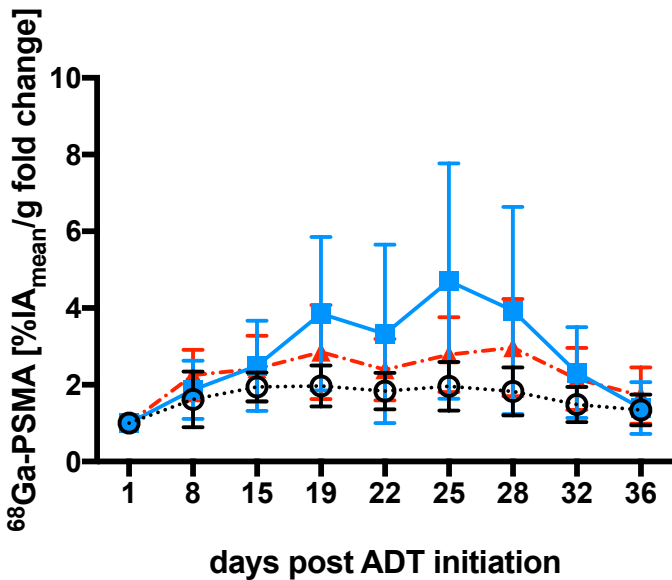

- vehicle SUVmean
- ENZ SUVmean
- ▲ BIC SUV mean
